# Supplementary material
Source: PubMed Central journal article supplement (PMC6382538)
Supplement: NIHMS1519468-supplement-1.pdf [file NIHMS1519468-supplement-1.pdf]

# Sources of thymidine and analogs fueling futile damage-repair cycles and ss-gap accumulation during thymine starvation in *Escherichia coli*

## Supplemental figures with legends

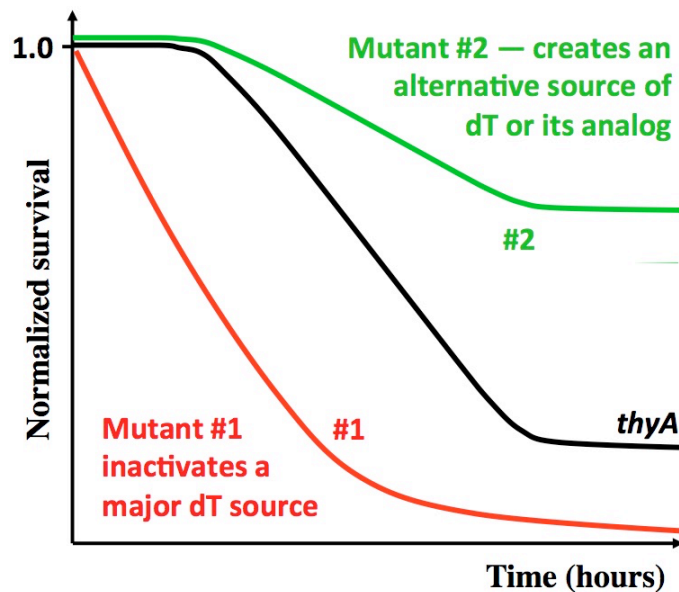

**Fig. S1. The two major expected types of TLD-affected mutants in nucleotide metabolism and their interpretations.** A stylized TLD kinetics of a *thyA* mutant is shown in black.

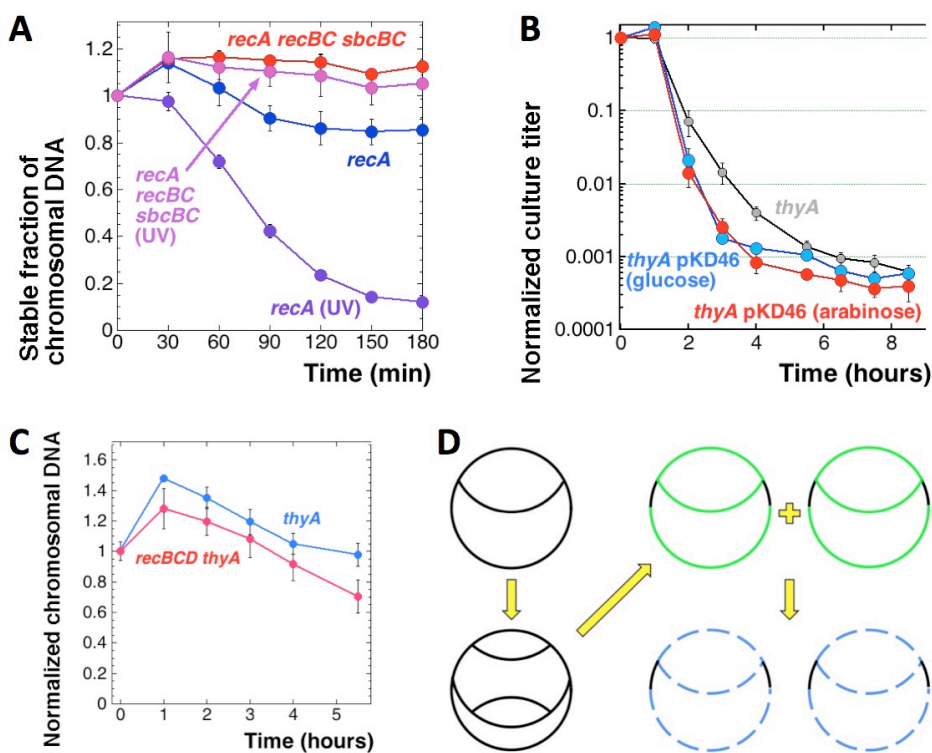

**Fig. S2. The role of linear DNA degradation in thymine starvation phenomena and suggested patterns of chromosomal DNA instability.**

**A.** Stabilization of pre-labeled chromosomal DNA (TCA-precipitable counts) in UV-irradiated *recA* mutant cells by *recBC sbcBC* defect. The strains are (all ThyA<sup>+</sup>): *recA*, RA50; *recA recBC sbcBC*, RA49. The UV-dose was 50J/m<sup>2</sup>.

**B.** Time course of TLD in the *thyA* pKD46 strain (KKW58). Glucose suppresses expression of the lambda Red proteins (inhibit RecBCD), arabinose induces them.

**C.** Evolution of the total amount of chromosomal DNA in the *thyA recBCD* mutant (KJK63) during T-starvation. The *thyA* mutant curve from Fig. 2E is shown for comparison.

**D.** A possible explanation for the observed pattern of the chromosomal DNA evolution. The accumulation during the resistance phase at first reflects the completion of the ongoing replication rounds with no new initiations, whereas the subsequent DNA instability, mostly during the RED phase reflects unknown defects in the nascent DNA (solid green), which eventually make this DNA unstable (dashed blue).

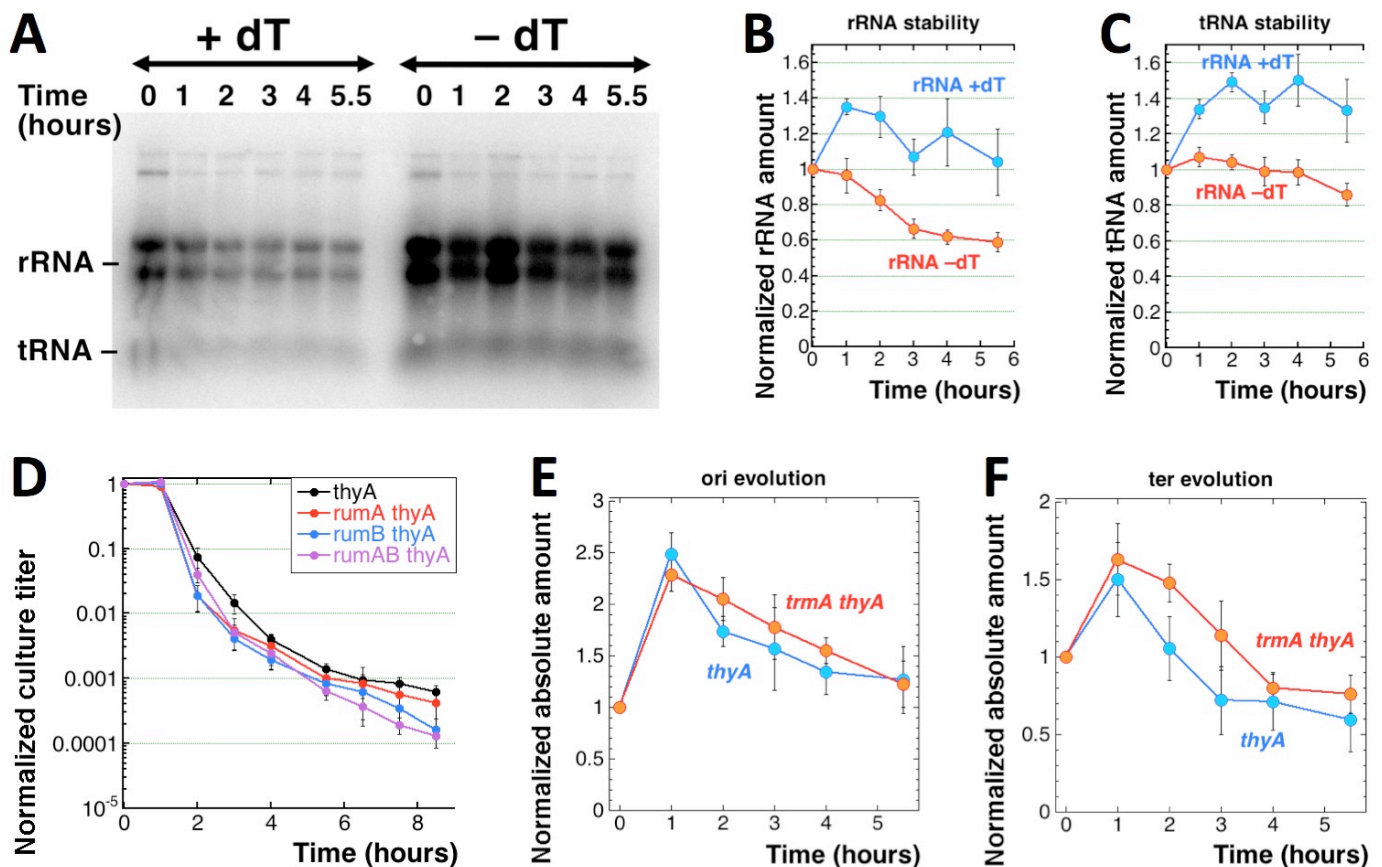

**Fig. S3. (A lack of) stable RNA contribution to resistance phase of TLD.**

**A.** The gel to determine stability rRNA and tRNA during growth. The *thyA* mutant (strain #) was labeled with  $^{32}\text{P}$ -orthophosphate during growth in the presence of dT, and then the medium was changed to one with or without dT, but having no label, and shaking of the culture continued at the same temperature. The culture grown in the presence of dT was gradually diluted several fold during growth, unlike the dT-less culture, — this is why the "+ dT" signal decreases substantially.

**B.** Stability of rRNA during thymine starvation, determined from several gels like in "B". The exogenous  $^{32}\text{P}$ -orthophosphoric acid keeps incorporating for at least one hour under these conditions (Kuong and Kuzminov 2012). At the indicated time points, the label in the rRNA bands was normalized to the label at the = 0. The strain is KKW58.

**C.** The same as in "C", but done for tRNA.

**D.** Time course of TLD in the *rumA* and *rumB* mutants. The strains are: *thyA*, KKW58; *rumA thyA*, RA10; *rumB thyA*, RA11; *rumAB thyA*, RA13.

**E.** Evolution of the replication origin absolute amount in the *thyA* and *trmA thyA* mutants (strains like in Fig. 3D) during T-starvation.

**F.** Same as in "F", but for the terminus.

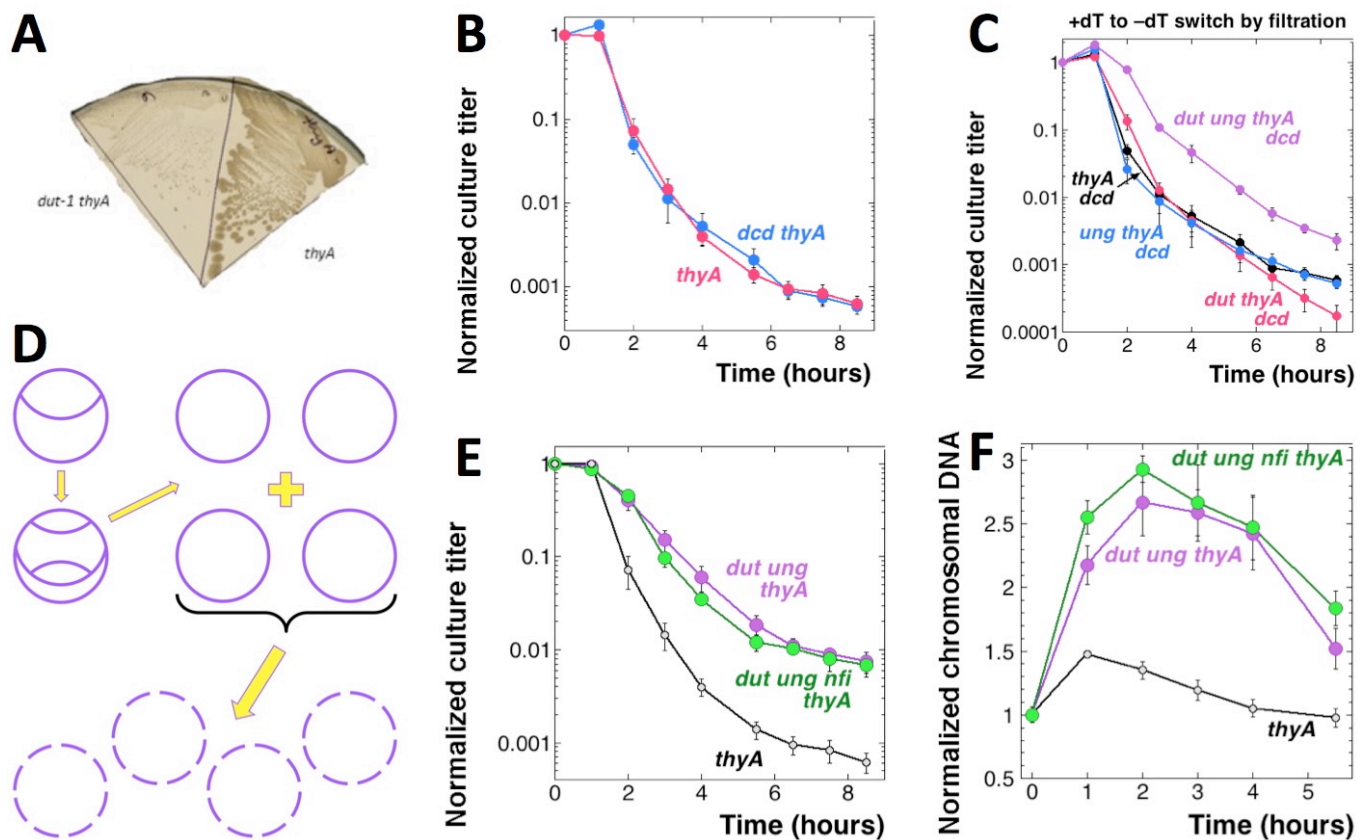

**Fig. S4. Testing uracil incorporation-excision as the cause of TLD and analysis of TLD in the *dut ung thyA* mutants.**

**A.** The extremely slow growth of the *dut thyA* mutant, even on rich medium supplemented with 3  $\mu\text{g/ml}$  dT (optimal concentration). The strains are: *thyA*, KKW58; *thyA dut-1*, RA16.

**B.** Time course of TLD in the *dcd thyA* mutant. The strains are: *thyA*, KKW58; *dcd thyA*, RA25.

**C.** Time course of TLD in the *dcd dut thyA* and *dcd ung thyA* mutants. The +dT/-dT medium switch is by filtration (standard procedure). Strains are: *dcd thyA*, RA25; *dcd dut thyA*, RA27; *dcd ung thyA*, RA26; *dcd dut ung thyA*, RA28.

**D.** A scheme of the chromosome behavior during T-starvation of the *thyA dut ung* mutant. The elevated pool of dUTP, in combination with DNA-dU stability, facilitates chromosomal replication to the extent that both the existing and the newly-initiated rounds are finished, yielding four complete chromosomes. However, most cells still die while their chromosomes are degraded, by unclear mechanisms.

**E.** TLD kinetics of the *dut ung thyA* versus *dut ung nfi thyA* mutants. The *thyA* mutant is shown as a control. Strains are: *thyA*, KKW58; *dut ung thyA*, RA18; *dut ung nfi thyA*, RA30.

**F.** Evolution of the chromosomal DNA amount during thymine starvation. The strains are like in "E".

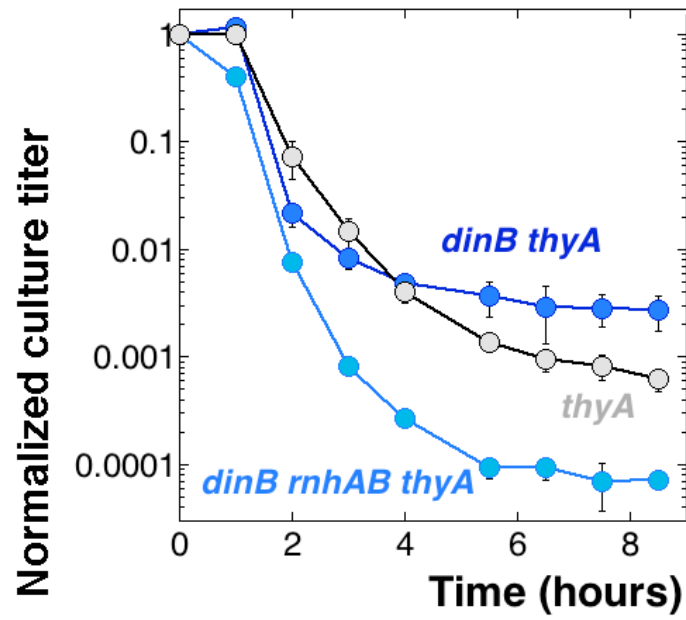

**Fig. S5. TLD kinetics of the *dinB thyA* mutant and its *dinB rnhAB thyA* variant.** Strains are: *dinB thyA*, KJK90; *dinB rnhAB thyA*, RA39.

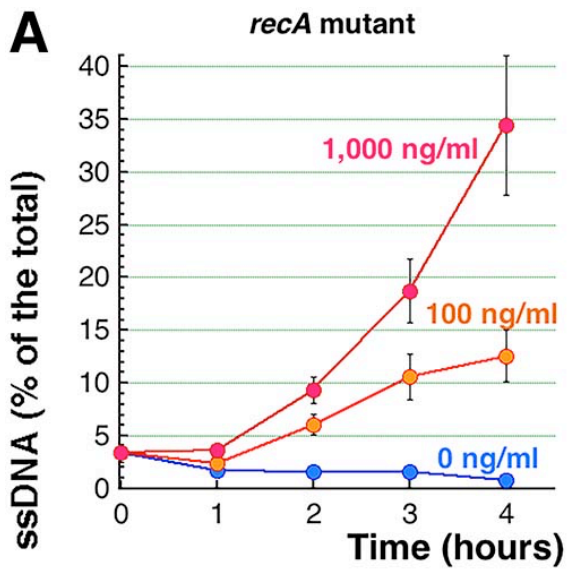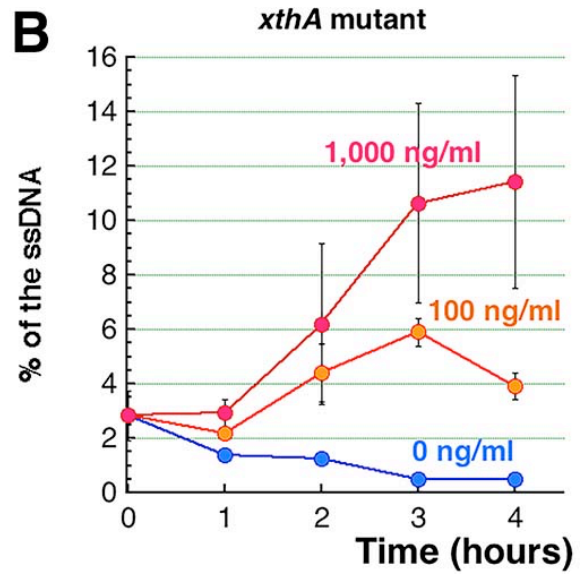

**Fig. S6. Single-stranded DNA accumulation in genomic DNA of growing cultures treated with 0, 100 or 1,000 ng/ml AZT.**

**A.** The *recA* mutant (RA50).

**B.** The *xthA* mutant (HT50).

**Table S1. *E. coli* strains and plasmids used in this study.****Published Strains**

| Strain Name | Relevant Genotype <sup>a</sup>             | Source                             |
|-------------|--------------------------------------------|------------------------------------|
| AAM1        | <i>ΔthyA71::cat</i>                        | (Kuong and Kuzminov 2009)          |
| AM3         | <i>recF20::cat</i>                         | (Miranda and Kuzminov 2003)        |
| BW1161      | <i>nfi::cat</i>                            | (Guo and Weiss 1998)               |
| ER131       | <i>ΔrnhA::cat</i>                          | (Kouzminova, Kadyrov et al. 2017)  |
| GY9701*     | <i>recA938::cam</i> miniF-kan <i>recA+</i> | R. Devoret via Benedicte Michel    |
| HT50        | <i>xthA::cat</i>                           | (Ting, Kouzminova et al. 2008)     |
| JB1 pSA122  | <i>ΔrecBCD3::kan</i> pRecBC+               | Lab collection                     |
| JC7623      | <i>recB21 recC22 sbcB15 sbcC201</i>        | (Kushner, Nagaishi et al. 1971)    |
| JW0178-1*   | <i>ΔrnhB782::kan</i>                       | CGSC#8427 (Baba, Ara et al. 2006)  |
| JW0221-1*   | <i>ΔdinB749::kan</i>                       | CGSC#8456 (Baba, Ara et al. 2006)  |
| JW0843-1*   | <i>ΔrumB760::kan</i>                       | CGSC#8879 (Baba, Ara et al. 2006)  |
| JW2756-1*   | <i>ΔrumA783::kan</i>                       | CGSC#11916 (Baba, Ara et al. 2006) |
| JW3937-1*   | <i>ΔtrmA753::kan</i>                       | CGSC#12049 (Baba, Ara et al. 2006) |
| KJK63       | <i>ΔthyA72 ΔdeoCABD2 ΔrecBCD3::kan</i>     | (Kuong and Kuzminov 2010)          |
| KJK78       | <i>ΔthyA72 ΔdeoCABD2 Δung::cat</i>         | (Kuong and Kuzminov 2010)          |
| KJK87       | <i>ΔthyA72 ΔdeoCABD2 ΔumuCD595::cat</i>    | Kawai Jessica Kuong, this lab      |
| KJK90       | <i>ΔthyA72 ΔdeoCABD2 ΔdinB749::kan</i>     | Kawai Jessica Kuong, this lab      |
| KJK183      | <i>ΔdeoCABD2 dut1 zic 4901::Tn10</i>       | Kawai Jessica Kuong, this lab      |
| KKW47       | <i>ΔdeoCABD1::cat</i>                      | (Kuong and Kuzminov 2009)          |
| KKW58       | <i>ΔthyA72 ΔdeoCABD2</i>                   | (Kuong and Kuzminov 2009)          |
| KKW59       | <i>ΔdeoCABD2</i>                           | (Kuong and Kuzminov 2009)          |
| L76         | AB1157 <i>dcd329::kan</i>                  | Elena Kouzminova, this lab         |
| L418        | <i>ΔrnhA::cat ΔrnhB782::kan</i>            | (Kouzminova, Kadyrov et al. 2017)  |
| RPC501      | AB1157 <i>nfo-1::kan</i>                   | (Cunningham, Saporito et al. 1986) |
| RW82        | <i>uvrA6 umuCD595::cat</i>                 | (Woodgate 1992)                    |

**This Study**

| Strain Name | Relevant Genotype <sup>a</sup>                                      | Construction                                            |
|-------------|---------------------------------------------------------------------|---------------------------------------------------------|
| RA9         | <i>ΔthyA72 ΔdeoCABD2 ΔtrmA753::kan</i>                              | KKW58 x P1 JW3937-1                                     |
| RA10        | <i>ΔthyA72 ΔdeoCABD2 ΔrumA783::kan</i>                              | KKW58 x P1 JW11916                                      |
| RA11        | <i>ΔthyA72 ΔdeoCABD2 ΔrumB760::kan</i>                              | KKW58 x P1 JW8879                                       |
| RA12        | <i>ΔthyA72 ΔdeoCABD2 ΔrumA</i>                                      | RA10 treated with pCP20                                 |
| RA13        | <i>ΔthyA72 ΔdeoCABD2 ΔrumA ΔrumB760::kan</i>                        | RA12 x P1 JW8879                                        |
| RA14        | <i>ΔthyA72 ΔdeoCABD2 ΔtrmA753::kan ΔrumB</i>                        | RA11 treated with pCP20 and transduced with P1 JW3937-1 |
| RA15        | <i>ΔthyA72 ΔdeoCABD2 ΔrumA ΔrumB ΔtrmA753::kan</i>                  | RA13 treated with pCP20 and transduced with P1 JW3937-1 |
| RA16        | <i>ΔthyA71::cat ΔdeoCABD2 dut-1 zic 4901::Tn10</i>                  | KJK183 x P1 AAM1                                        |
| RA17        | <i>ΔthyA72 ΔdeoCABD2 dut-1 zic 4901::Tn10</i>                       | RA16 treated with pCP20                                 |
| RA18        | <i>ΔthyA72 ΔdeoCABD2 dut-1 zic 4901::Tn10 Δung::cat</i>             | RA17 x P1 KJK78                                         |
| RA22        | <i>ΔthyA72 ΔdeoCABD2 ΔxthA::cat</i>                                 | KKW58 x P1 HT50                                         |
| RA23        | <i>ΔthyA72 ΔdeoCABD2 Δnfo-1::kan</i>                                | KKW58 x P1 RPC501                                       |
| RA24        | <i>ΔthyA72 ΔdeoCABD2 ΔxthA::cat Δnfo-1::kan</i>                     | RA22 x P1 HT50                                          |
| RA25        | <i>ΔthyA72 ΔdeoCABD2 dcd329::kan</i>                                | KKW58 x P1 L76                                          |
| RA26        | <i>ΔthyA72 ΔdeoCABD2 Δung::cat dcd329::kan</i>                      | KJK78 x P1 L76                                          |
| RA27        | <i>ΔthyA72 ΔdeoCABD2 dut-1 zic 4901::Tn10 dcd329::kan</i>           | RA16 x P1 L76                                           |
| RA28        | <i>ΔthyA72 ΔdeoCABD2 dut-1 zic 4901::Tn10 Δung::cat dcd329::kan</i> | RA17 x P1 L76                                           |
| RA29        | <i>ΔthyA72 ΔdeoCABD2 dut-1 zic 4901::Tn10 Δung</i>                  | RA18 treated with pCP20                                 |
| RA30        | <i>ΔthyA72 ΔdeoCABD2 dut-1 zic 4901::Tn10 Δung Δnfi::cat</i>        | RA29 x P1 BW1161                                        |

|      |                                                                    |                                                       |
|------|--------------------------------------------------------------------|-------------------------------------------------------|
| RA31 | <i>ΔthyA72 ΔdeoCABD2 ΔrecF20::cat</i>                              | KJK78 x P1 AM3                                        |
| RA32 | <i>ΔthyA72 ΔdeoCABD2 dut-1 zic 4901::Tn10 Δung ΔrecF20::cat</i>    | RA29 x P1 AM3                                         |
| RA33 | <i>ΔthyA72 ΔdeoCABD2 ΔrnhA::cat</i>                                | KKW58 x P1 ER131                                      |
| RA34 | <i>ΔthyA72 ΔdeoCABD2 ΔrnhB782::kan</i>                             | KKW58 x P1 JW0178-1                                   |
| RA35 | <i>ΔthyA72 ΔdeoCABD2 ΔrnhA::cat ΔrnhB782::kan</i>                  | KKW58 x P1 L418                                       |
| RA36 | <i>ΔthyA72 ΔdeoCABD2 ΔdinB749::kan umuCD595::cat</i>               | KJK87 x P1JW0221-1                                    |
| RA37 | <i>ΔthyA72 ΔdeoCABD2 ΔrnhA::cat ΔrnhB782::kan pEAK86</i>           |                                                       |
| RA38 | <i>ΔthyA72 ΔdeoCABD2 ΔrnhA2 ΔrnhB2</i>                             | RA35 treated with pCP20                               |
| RA39 | <i>ΔthyA72 ΔdeoCABD2 ΔrnhA2 ΔrnhB2 ΔdinB749::kan</i>               | RA38 x P1 JW0221-1                                    |
| RA40 | <i>ΔthyA72 ΔdeoCABD2 ΔrnhA2 ΔrnhB2 umuCD595::cat</i>               | RA38 x P1 RW82                                        |
| RA41 | <i>ΔthyA72 ΔdeoCABD2 ΔrnhA2 ΔrnhB2 ΔdinB749::kan umuCD595::cat</i> | RA39 x P1 RW82                                        |
| RA42 | <i>ΔdeoCABD::cat recB21 recC22 sbcB15 sbcC201</i>                  | JC7623 x P1 KKW47                                     |
| RA43 | <i>ΔdeoCABD2 recB21 recC22 sbcB15 sbcC201</i>                      | RA42 treated with pCP20                               |
| RA44 | <i>ΔthyA71::cat ΔdeoCABD2 sbcB15 sbcC201</i>                       | RA43 x AAM1                                           |
| RA45 | <i>ΔthyA71::cat ΔdeoCABD2 sbcB15 sbcC201 ΔrecBCD::kan</i>          | RA44 x P1 JB1 pSA122                                  |
| RA46 | <i>recA938::cat ΔthyA72 ΔdeoCABD2</i>                              | KKW58 x P1 GY9701                                     |
| RA47 | <i>ΔrecBCD sbcB15 sbcC201 recA938::cat ΔthyA72 ΔdeoCABD2</i>       | RA45 treated with pCP20 and transduced with P1 GY9701 |
| RA48 | <i>ΔdeoCABD2 recF20::cat</i>                                       | KKW59 x P1 AM3                                        |
| RA49 | <i>recA938::cat recB21 recC22 sbcB15 sbcC201</i>                   | JC7623 x P1 GY9701                                    |
| RA50 | <i>recA938::cat</i>                                                | AB1157 x P1 GY9701                                    |

a — Background for all strains, except those marked with \* is AB1157, which also includes: F– lambda– rac– *thi-1 hisG4 D(gpt-proA)62 argE3 thr-1 leuB6 kdgK51 rfbD1 araC14 lacYI galK2 xylA5 mtl-1 tsx-33 glnV44 rpsL31*

## Plasmids

| Plasmid | Replicon/drug resistance/other genes              | Reference                         |
|---------|---------------------------------------------------|-----------------------------------|
| pBR322  | cloning vector / <i>bla tet</i>                   | (Bolivar, Rodriguez et al. 1977)  |
| pMTL20  | pBR322 / <i>bla / lacZ alpha</i>                  | (Chambers, Prior et al. 1988)     |
| pEAK86  | pSC101* / <i>bla / csdA</i>                       | (Kouzminova, Kadyrov et al. 2017) |
| pCP20   | Rep <sup>ts</sup> / <i>bla cat / FLP+</i>         | (Datsenko and Wanner 2000)        |
| pKD46   | Rep <sup>ts</sup> / <i>bla / exo gam bet araC</i> | (Datsenko and Wanner 2000)        |
| pSA122  | p15A / <i>cat / recB+ recC+</i>                   | (Amundsen, Taylor et al. 2000)    |

## Primers

### *Δ trmA*

To verify deletion

PR01 CCGTCATTATGGTGTCTGG

PR02 CAAGTGGATGCTACAGGTTG

### *Δ rumA*

To verify deletion



PR06 CCAGGATCAGAATCATCATGCGTG  
PR07 GTGCACTTCTTACCGCAACC

**$\Delta$  *rumB***

To verify deletion

PR08 CCAGTCGGCGGTTCTTCCAG  
PR09 CAATCTGAAGCCGCACATGC

***dcd***

To verify *dcd329* insertion

PR10 GTGATAACCTAGTATGCCCTTGACG  
PR11 CAGGAGTATCATCAGCGTCG

**$\Delta$  *nfi***

To verify deletion

PR14 TTGCAGGTTTCGGTCACGGC  
PR15 CGGTAAATTTGCCCATCACC

**$\Delta$  *nfo***

To verify deletion

PR23 AAAGCTGGGGCGAAACCTCTG  
PR24 GAGCAATGAATTGTACCGGG

**$\Delta$  *deoCABD***

To verify deletion

PR42 TTGATCCTGATGCGTTTGCC  
PR43 ATCCAGAGGAATTTCCGCAG

***recB***

To verify *recB21* insertion

PR44 AAGAATGAGTGATGTGCGCCG  
PR45 GCATCATGACTTAACAGTGCCG

**$\Delta$  *rnhA***

#167 GCACCAATCTGGTTCATACC  
#168 CAATGTCGTAAACCACAGGC

**$\Delta$  *rnhB***

To verify deletion

#269 GAACTGCATCAGCAGATCCG  
#270 CAGACATCTTCAGATTCCGG

**$\Delta$  *dinB***

To verify deletion

dinB( Exp)F CGCGAATTCCGCAGCGAACGCGTTAAATG  
dinB( PCR)B AACGCTTCGAATGCGCTGGC

### $\Delta$ *umuDC*

To verify deletion

umuCD( Exp)F CGCGAATTCCAGTCATAATCATTCGCCTC  
umuCD ( PCR)B GATCTGTTCCGGTCGCTAATC

### $\Delta$ *xthA*

To verify deletion

xthA(F) CGGTAAGCAACGCGAAATTC

xthA(B) GTATAACAAAGGACGGCAGG

## References

Amundsen, S. K., A. F. Taylor and S. G.R. (2000). "The RecD subunit of the *Escherichia coli* RecBCD enzyme inhibits RecA loading, homologous recombination, and DNA repair." Proc. Natl. Acad. Sci. USA **97**(13): 7399-7404.

Baba, T., T. Ara, M. Hasegawa, Y. Takai, Y. Okumura, M. Baba, K. A. Datsenko, M. Tomita, B. L. Wanner and H. Mori (2006). "Construction of *Escherichia coli* K-12 in-frame, single-gene knockout mutants: the Keio collection." Mol. Syst. Biol. **2**: 2006.0008.

Bolivar, F., R. Rodriguez, P. J. Greene, M. Betlach, H. L. Heyneker, H. W. Boyer, J. Crosa and S. Falkow (1977). "Construction and characterization of new cloning vehicles. II. A multipurpose cloning system." Gene **2**: 95-113.

Chambers, S. P., S. E. Prior, D. A. Barstow and N. P. Minton (1988). "The pMTL  $nic^{-}$  cloning vectors. I. Improved pUC polylinker regions to facilitate the use of sonicated DNA for nucleotide sequencing." Gene **68**: 139-149.

Cunningham, R. P., S. M. Saporito, S. G. Spitzer and B. Weiss (1986). "Endonuclease IV (*nfo*) mutant of *Escherichia coli*." J. Bacteriol. **168**: 1120-1127.

Datsenko, K. A. and B. L. Wanner (2000). "One-step inactivation of chromosomal genes in *Escherichia coli* K-12 using PCR products." Proc. Natl. Acad. Sci. USA **97**(12): 6640-6645.

Guo, G. and B. Weiss (1998). "Endonuclease V (*nfi*) mutant of *Escherichia coli* K-12." J. Bacteriol. **180**(1): 46-51.

Kouzminova, E. A., F. F. Kadyrov and A. Kuzminov (2017). "RNase HII Saves *rnhA* Mutant *Escherichia coli* from R-Loop-Associated Chromosomal Fragmentation." J. Mol. Biol. **429**: 2873-2894.

Kuong, K. J. and A. Kuzminov (2009). "Cyanide, peroxide and nitric oxide formation in solutions of hydroxyurea causes cellular toxicity and may contribute to its therapeutic potency." J. Mol. Biol. **390**: 845-862.

Kuong, K. J. and A. Kuzminov (2010). "Stalled replication fork repair and misrepair during thymineless death in *Escherichia coli*." Genes Cells **15**: 619-634.

Kuong, K. J. and A. Kuzminov (2012). "Disintegration of nascent replication bubbles during thymine starvation triggers RecA- and RecBCD-dependent replication origin destruction." J. Biol. Chem. **287**: 23958-23970.

Kushner, S. R., H. Nagaishi, A. Templin and A. J. Clark (1971). "Genetic recombination in *Escherichia coli*: the role of Exonuclease I." Proc. Natl. Acad. Sci. USA **68**: 824-827.

Miranda, A. and A. Kuzminov (2003). "Chromosomal lesion suppression and removal in *Escherichia coli* via linear DNA degradation." Genetics **163**: 1255-1271.

Ting, H., E. A. Kouzminova and A. Kuzminov (2008). "Synthetic lethality with the *dut* defect in *Escherichia coli* reveals layers of DNA damage of increasing complexity due to uracil incorporation." J. Bacteriol. **190**: 5841-5854.

Woodgate, R. (1992). "Construction of a *umuDC* operon substitution mutation in *Escherichia coli*." Mutat. Res. **281**: 221-225.
